# Supplementary material for: Efficient light-scattering functionalized TiO2 photoanodes modified with cyanobiphenyl-based benzimidazole for dye-sensitized solar cells with additive-free electrolytes
Source: Royal Society of Chemistry journal article supplement (doi:10.1039/c2jm32607h), 2012-01-01
Supplement: c2jm32607h.pdf [file c2jm32607h.pdf]

Supplementary Material (ESI) for Journal of Materials Chemistry

This journal is © The Royal Society of Chemistry 2007

*Electronic Supplementary Information (ESI) for*

**An Efficient Light-Scattering Functionalized TiO<sub>2</sub> Photoanodes Modified  
with Cyanobiphenyl-based Benzimidazole for Dye-Sensitized Solar Cells  
with Additive-Free Electrolytes**

Jie Zhao, Baoquan Sun, Lihua Qiu, Huizi Caocen, Qing Li, Xiaojian Chen, and Feng Yan\*

1-Bromo-6-(4-cyanobiphenyl-4'-oxy)hexane  
Std proton

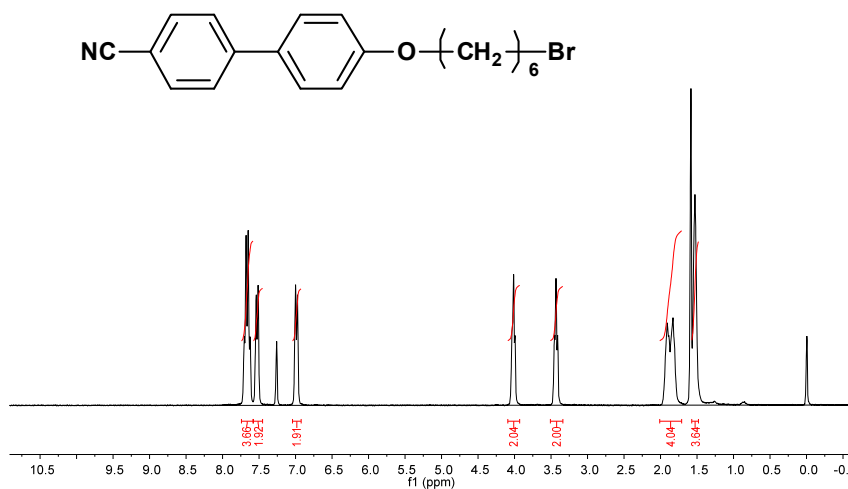

**Fig. S1** <sup>1</sup>H NMR spectrum of 1-bromo-6-(4-cyanobiphenyl-4'-oxy)hexane (BrCH).

N-6-(4-cyanobiphenyl-4'-oxy)hexyl benzimidazole  
Std proton

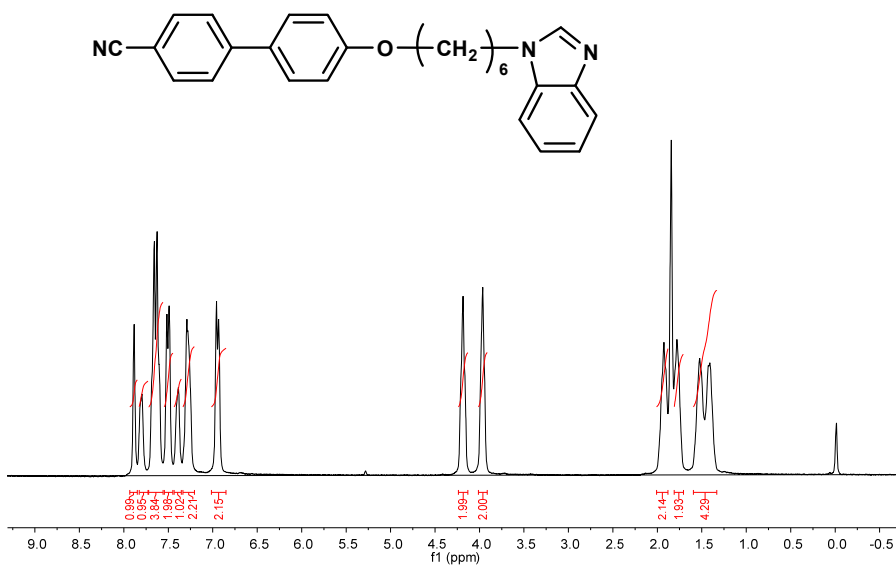

**Fig. S2** <sup>1</sup>H NMR spectrum of N-6-(4-cyanobiphenyl-4'-oxy)hexyl benzimidazole (NCHB).

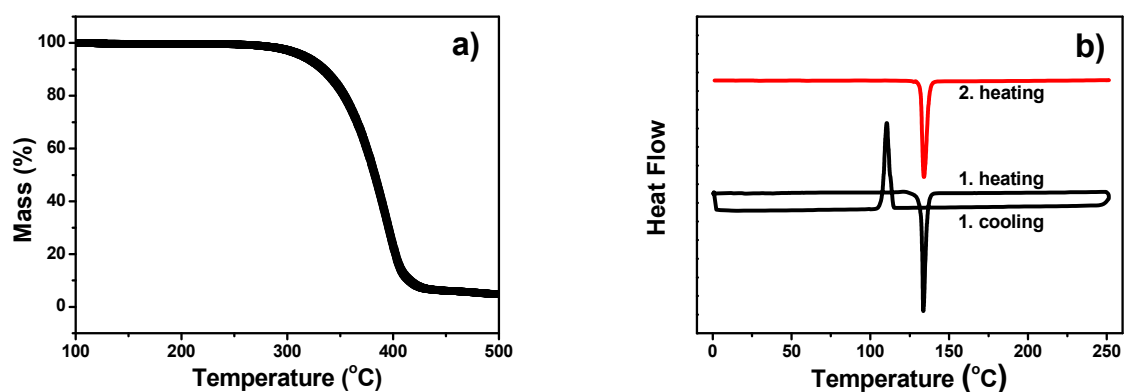

**Fig. S3** TGA and DSC curves of NCHB.

In the TGA curve of NCHB, no obvious weight loss below 300 °C showed a good thermostability of NCHB. In addition, the relatively high melting point (133 °C) also indicated that NCHB could offer a high thermal transformation property, far beyond the operating temperature (50-80 °C) of the DSSCs.

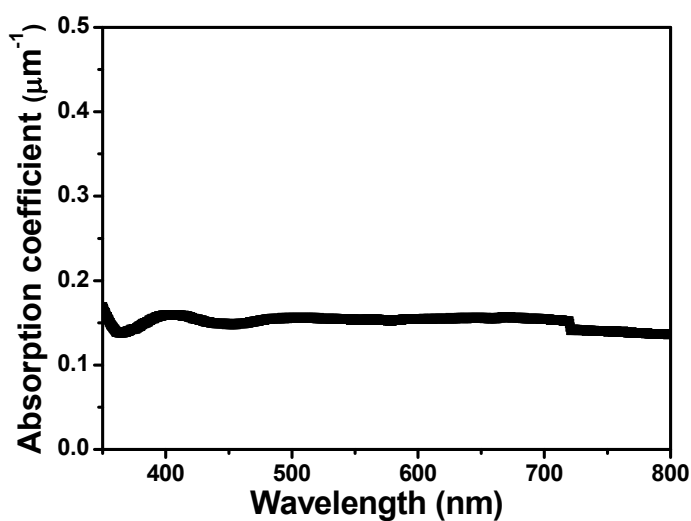

**Fig. S4** UV absorption spectrum of NCHB film on FTO glass (FTO glass substrate as a baseline).
